# Supplementary material for: Effect of Constant Temperatures on Culicoides sonorensis Midge Physiology and Vesicular Stomatitis Virus Infection
Source: MDPI journal article supplement (doi:10.3390/insects13040372), 2022-04-09
Supplement: s1 [file s1]

**Table S1.** Statistical results of Tukey's multiple comparisons test to determine the differences in the gonotrophic cycle length

| Gonotrophic Cycle | Comparison <sup>1</sup> | Adjusted <i>p</i> -value | <i>p</i> -value Summary <sup>2</sup> |
|-------------------|-------------------------|--------------------------|--------------------------------------|
| 1GC               | 20 vs. 25 °C            | <0.0001                  | ****                                 |
|                   | 20 vs. 30 °C            | <0.0001                  | ****                                 |
|                   | 20 vs. 35 °C            | <0.0001                  | ****                                 |
|                   | 25 vs. 30 °C            | <0.0001                  | ****                                 |
|                   | 25 vs. 35 °C            | <0.0001                  | ****                                 |
|                   | 30 vs. 35 °C            | >0.9999                  | ns                                   |
| 2GC               | 20 vs. 25°C             | <0.0001                  | ****                                 |
|                   | 20 vs. 30 °C            | <0.0001                  | ****                                 |
|                   | 20 vs. 35 °C            | <0.0001                  | ****                                 |
|                   | 25 vs. 30 °C            | <0.0001                  | ****                                 |
|                   | 25 vs. 35 °C            | <0.0001                  | ****                                 |
|                   | 30 vs. 35 °C            | >0.9999                  | ns                                   |
| 3GC               | 30 vs. 35 °C            | >0.9999                  | ns                                   |

<sup>1</sup> Length of each GC was affected by temperature but not infection status. Results for VSV and Control groups are shown together for each temperature comparison. <sup>2</sup> *p* > 0.05, ns, not significant; \*\*\*\* *p* ≤ 0.0001. Results shown in Figure 2a.

**Table S2.** Statistical results of the Mantel–Cox model applied to determine the survival probability

| Comparison           | $\chi^2$ | df | <i>p</i> -value | <i>p</i> -value Summary <sup>1</sup> |
|----------------------|----------|----|-----------------|--------------------------------------|
| All groups           | 114.5    | 7  | <0.0001         | ****                                 |
| 20 °C (VSV vs. Ctrl) | 0.048    | 1  | 0.826           | ns                                   |
| 25 °C (VSV vs. Ctrl) | 0.003    | 1  | 0.957           | ns                                   |
| 30 °C (VSV vs. Ctrl) | 0.015    | 1  | 0.903           | ns                                   |
| 35 °C (VSV vs. Ctrl) | 0.005    | 1  | 0.946           | ns                                   |

<sup>1</sup> *p* > 0.05, ns, not significant; \*\*\*\* *p* ≤ 0.001. Results shown in Figure 2b.

**Table S3.** *Culicoides* resting temperature preference after engorgement

| Blood Meal | Temperature (Infection Group) | Temperature Range Selected <sup>2</sup> |           |            |           |           |           |
|------------|-------------------------------|-----------------------------------------|-----------|------------|-----------|-----------|-----------|
|            |                               | 11 ± 1 °C                               | 15–20 °C  | 20–25 °C   | 25–30 °C  | 30–35 °C  | 34 ± 1 °C |
| 1BM        | All <sup>1</sup>              | 2.6 ± 1.9                               | 5.7 ± 2.4 | 31.4 ± 6.1 | 43.7 ± 6  | 12 ± 6.1  | 4.6 ± 3.4 |
| 2BM        | 20°C (VSV)                    | 0                                       | 5 ± 2     | 24 ± 3.3   | 36 ± 8.6  | 18 ± 8.3  | 17 ± 3.8  |
|            | 20°C (Ctrl)                   | 3 ± 2                                   | 4 ± 3.3   | 17 ± 3.8   | 38 ± 7    | 21 ± 5    | 17 ± 6    |
|            | 25°C (VSV)                    | 2 ± 2.3                                 | 8 ± 6.5   | 28 ± 8.6   | 31 ± 6.8  | 18 ± 10.6 | 13 ± 6.8  |
|            | 25°C (Ctrl)                   | 3 ± 3.8                                 | 8 ± 7.3   | 19 ± 9.5   | 40 ± 5.7  | 24 ± 5.7  | 6 ± 9     |
|            | 30°C (VSV)                    | 1 ± 2                                   | 8 ± 4.6   | 24 ± 6.5   | 41 ± 6    | 15 ± 10   | 11 ± 3.8  |
|            | 30°C (Ctrl)                   | 3 ± 2                                   | 10 ± 4    | 28 ± 12.6  | 31 ± 5    | 15 ± 9.4  | 13 ± 11.5 |
|            | 35°C (VSV)                    | 1 ± 2                                   | 13 ± 13.2 | 34 ± 8     | 28 ± 11.8 | 14 ± 12.4 | 10 ± 5.1  |
|            | 35°C (Ctrl)                   | 1 ± 2                                   | 7 ± 6.8   | 20 ± 10    | 37 ± 5    | 27 ± 11.5 | 8 ± 8.6   |
| 3BM        | 20°C (VSV)                    | 0                                       | 10 ± 2.3  | 31 ± 3.8   | 32 ± 5.7  | 19 ± 6    | 8 ± 3.3   |
|            | 20°C (Ctrl)                   | 2 ± 4                                   | 7 ± 5     | 27 ± 6     | 36 ± 3.3  | 19 ± 11   | 9 ± 2     |
|            | 25°C (VSV)                    | 3 ± 3.8                                 | 8 ± 6.5   | 32 ± 11.8  | 36 ± 5.7  | 11 ± 5    | 10 ± 5.2  |
|            | 25°C (Ctrl)                   | 3 ± 3.8                                 | 9 ± 6     | 26 ± 4     | 30 ± 6.9  | 24 ± 8.6  | 8 ± 3.3   |
|            | 30°C (VSV)                    | 3 ± 3.8                                 | 3 ± 2     | 29 ± 7.6   | 46 ± 15.5 | 14 ± 10.6 | 5 ± 3.8   |
|            | 30°C (Ctrl)                   | 1 ± 2                                   | 8 ± 0     | 32 ± 6.5   | 36 ± 10.8 | 21 ± 11   | 2 ± 2.3   |
|            | 35°C (VSV)                    | 6 ± 7.7                                 | 3 ± 6     | 30 ± 12    | 28 ± 3.3  | 19 ± 9.4  | 14 ± 7.7  |
|            | 35°C (Ctrl)                   | 1 ± 2                                   | 11 ± 5    | 28 ± 10.3  | 37 ± 13.2 | 14 ± 9.5  | 9 ± 8.9   |

<sup>1</sup> Data of both treatments were pooled to evaluate the resting temperature preference after the engorgement of midges with their first blood meal. <sup>2</sup> Percentage of midges (mean  $\pm$  standard deviation) choosing to rest in each temperature zone.
